# Supplementary material
Source: Elsevier journal article supplement (https://www.sciencedirect.com/science/article/pii/S0213911120301941)
Supplement: mmc1 [file S0213911120301941:mmc1.docx]

**Appendix**

Table I

Age-standardised prevalence (%) and adjusteda prevalence ratio (PR) of physical and mental health in EJUSTA participants compared with the manual classb non-energy poor Barcelona population, stratified by sex. Barcelona, 2016.

|  | **Women** | | | | **Men** | | | |
| --- | --- | --- | --- | --- | --- | --- | --- | --- |
| **(n = 2849)** | | | | **(n = 1595)** | | | |
| **Prevalence** | **PR** | **95%CI** | | **Prevalence** | **PR** | **95%CI** | |
| *Poor health* |  |  |  |  |  |  |  |  |
| Manual class BCN | 24.5 | 1 |  |  | 21.4 | 1 |  |  |
| EJUSTA | 58.6 | 2.13 | 1.84-2.47e | | 56.7 | 2.51 | 2.04-3.08e  3.90 | |
| *Asthma* |  |  |  |  |  |  |  |  |
| Manual class BCN | 7.6 | 1 |  |  | 4.3 |  |  |  |
| EJUSTA | 15.6 | 2.17 | 1.51-3.11e  3.77 | | 11.8 | 2.35 | 1.39-3.95e  2.82 | |
| *Chronic bronchitis* |  |  |  |  |  |  |  |  |
| Manual class BCN | 4.0 | 1 |  |  | 4.0 |  |  |  |
| EJUSTA | 18.0 | 3.48 | 2.35-5.16e  6.73 | | 17.1 | 3.36 | 2.12-5.32e  6.70 | |
| *Depression and/or anxiety* |  |  |  |  |  |  |  |  |
| Manual class BCN | 20.9 | 1 |  |  | 14.6 |  |  |  |
| EJUSTA | 57.5 | 2.77 | 2.29-3.37e  3.811 | | 46.7 | 3.21 | 2.42-4.26e  5.41 | |

BCN: non-energy-poor population; 95%CI: 95% confidence interval; :; PR: prevalence ratio

aAll prevalence ratios were adjusted by age.

bWe sampled non-energy poor manual class population from BHS. Social class was measured using the Spanish Society of Epidemiology’s classification, which is based on the current or last occupation, then the responses were classified as non-manual class and manual class. We sampled manual class population without any EP indicator.

c.

d.

e.
